# Supplementary material for: Life After Loss: A Prospective Analysis of Mortality Exposure and Unintended Fertility
Source: Oxford University Press journal article supplement (doi:10.1215/00703370-9807961), 2022-03-09
Supplement: smith-greenaway_esm.pdf [file smith-greenaway_esm.pdf]

## Online Appendices

Appendix A. Reproductive, demographic, and psychosocial indicators, by study outcome among 15- to 25-year-old women in Balaka, Malawi

|                                        | Any<br>Pregnancy | Unintended<br>Pregnancy | Intended<br>Pregnancy | No<br>pregnancy<br>(as intended) |
|----------------------------------------|------------------|-------------------------|-----------------------|----------------------------------|
| <i>Intercourse &amp; Contraception</i> |                  |                         |                       |                                  |
| No intercourse (past 4 wks)            | 28.7             | 36.9                    | 13.3                  | 52.6                             |
| No contraceptive use                   | 55.8             | 43.7                    | 78.4                  | 24.6                             |
| Traditional method                     | 1.7              | 2.1                     | 1.1                   | 0.9                              |
| Consistent condom use                  | 0.2              | 0.3                     | 0.0                   | 0.2                              |
| Pill                                   | 1.7              | 1.7                     | 1.7                   | 1.1                              |
| Injectable                             | 11.7             | 15.0                    | 5.5                   | 18.2                             |
| Implant                                | 0.2              | 0.3                     | 0.0                   | 2.2                              |
| IUD                                    | 0.0              | 0.0                     | 0.0                   | 0.2                              |
| <i>Demographic indicators</i>          |                  |                         |                       |                                  |
| Marital status                         |                  |                         |                       |                                  |
| Never married                          | 34.5             | 43.5                    | 17.5                  | 57.5                             |
| Formerly married                       | 11.4             | 12.4                    | 9.5                   | 9.7                              |
| Currently married                      | 54.1             | 44.1                    | 73.0                  | 32.8                             |
| Age                                    | 21.4 (3.2)       | 20.9 (3.3)              | 22.1 (2.8)            | 20.9 (3.4)                       |
| Childless                              | 38.7             | 40.7                    | 34.9                  | 54.3                             |
| <i>Psychosocial indicators</i>         |                  |                         |                       |                                  |
| Think about future                     |                  |                         |                       |                                  |
| Rarely                                 | 6.2              | 5.6                     | 7.4                   | 3.8                              |
| Sometimes                              | 12.8             | 13.5                    | 11.6                  | 7.4                              |
| Fairly often                           | 28.6             | 28.4                    | 29.1                  | 23.0                             |
| Very often                             | 52.4             | 52.5                    | 51.9                  | 65.8                             |
| Children "just happen"                 | 53.2             | 53.7                    | 52.4                  | 39.7                             |
| N                                      | 545              | 356                     | 189                   | 713                              |

Source: Tsogolo la Thanzi-1 (N=1,259 women)

Note: All indicators are measured at wave immediately preceding the conception/last observation for women who never conceived, aside from the psychosocial indicators.

Appendix B. 15- to 25-year-old women's funeral attendance at baseline of two-year study period (2009-2011) in Balaka, Malawi, by baseline socioeconomic characteristics

|                                 | Number of funerals attended in prior month |      |
|---------------------------------|--------------------------------------------|------|
|                                 | Mean                                       | S.D. |
| <i>Psychosocial controls</i>    |                                            |      |
| Future orientation              |                                            |      |
| Rarely think about future       | 1.0                                        | 0.2  |
| Sometimes                       | 1.0                                        | 0.1  |
| Fairly often                    | 1.1                                        | 0.1  |
| Very often (ref)                | 1.1                                        | 0.1  |
| Disagree children "just happen" | 1.0                                        | 0.5  |
| Agree children "just happen"    | 1.2*                                       | 0.5  |
| <i>Education</i>                |                                            |      |
| Discontinued at primary level   | 1.1                                        | 0.4  |
| Secondary school or higher      | 1.1                                        | 0.6  |
| <i>Household wealth</i>         |                                            |      |
| Below average wealth            | 1.2                                        | 0.5  |
| Above average wealth            | 1.0*                                       | 0.5  |
| <i>Natal family size</i>        |                                            |      |
| Fewer than average siblings     | 1.1                                        | 0.0  |
| More than average siblings      | 1.2                                        | 0.1  |
| <i>Has children</i>             |                                            |      |
| 1 or fewer children             | 1.0                                        | 0.0  |
| 2+ children                     | 1.4*                                       | 0.1  |
| <i>Age</i>                      |                                            |      |
| 15 to 19 years                  | 0.8                                        | 0.0  |
| 20+ years                       | 1.4*                                       | 0.0  |
| <i>Marital status</i>           |                                            |      |
| Never married                   | 0.8*                                       | 0.0  |
| Formerly married                | 1.5                                        | 0.1  |
| Currently married               | 1.4                                        | 0.1  |

Source: Tsogolo la Thanzi-1 (N=1,272 women)

Note: Independent variables measured at the baseline wave.

\* $p < .05$  ( $t$ -test)

Appendix C. Competing Cox proportional hazard models of intended pregnancy vs. no pregnancy (with competing risk of unintended pregnancy), among 15- to 25-year-old women over two-year study period (2009-2011) in Balaka, Malawi

|                                           | Model 1      |          | Model 2      |           |
|-------------------------------------------|--------------|----------|--------------|-----------|
|                                           | Hazard ratio | SE       | Hazard ratio | SE        |
| <i>Mortality exposure</i>                 |              |          |              |           |
| Number of funerals attended <sub>tv</sub> | 1.184        | ** 0.069 | 1.041        | 0.066     |
| <i>Psychosocial controls</i>              |              |          |              |           |
| Future orientation                        |              |          |              |           |
| Rarely                                    |              |          | 1.198        | 0.346     |
| Sometimes                                 |              |          | 0.738        | 0.185     |
| Fairly often                              |              |          | 0.893        | 0.145     |
| Very often (ref)                          |              |          | --           | --        |
| Children "just happen"                    |              |          | 1.098        | 0.170     |
| <i>Socioeconomic controls</i>             |              |          |              |           |
| Highest year school <sub>tv</sub>         |              |          | 0.964        | 0.030     |
| Household wealth index <sub>tv</sub>      |              |          | 0.820        | *** 0.038 |
| <i>Demographic controls</i>               |              |          |              |           |
| Total siblings                            |              |          | 1.042        | 0.027     |
| Total number of children                  |              |          | 0.377        | *** 0.043 |
| Age <sub>tv</sub>                         |              |          | 1.163        | *** 0.037 |
| Recently bereaved by child death          |              |          | 1.617        | 0.634     |
| Marital status <sub>tv</sub>              |              |          |              |           |
| Never married (ref)                       |              |          | --           | --        |
| Formerly married                          |              |          | 3.190        | *** 1.173 |
| Currently married                         |              |          | 7.667        | ** 1.991  |
| Model fit (LR chi-square)                 | 8.350        | **       | 238.550      | ***       |

Source: Tsogolo la Thanzi-1 (N=1,259 women; 5,649 person-waves)

Note: results represent the sub-distribution hazard rate for intended pregnancy while adjusting for competing risk of unintended pregnancy

tv=time-varying controls measured at each wave

\*\*\*p<.001; \*\*p<.01
